# Supplementary material for: CryoEM reveals that ribosomes in microsporidian spores are locked in a dimeric hibernating state
Source: PubMed Central journal article supplement (PMC10522483; doi:10.1038/s41564-023-01469-w), 2023-09-14
Supplement: 41564_2023_1469_MOESM1_ESM.pdf [file 41564_2023_1469_MOESM1_ESM.pdf]

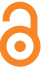

# **CryoEM reveals that ribosomes in microsporidian spores are locked in a dimeric hibernating state**

---

In the format provided by the authors and unedited

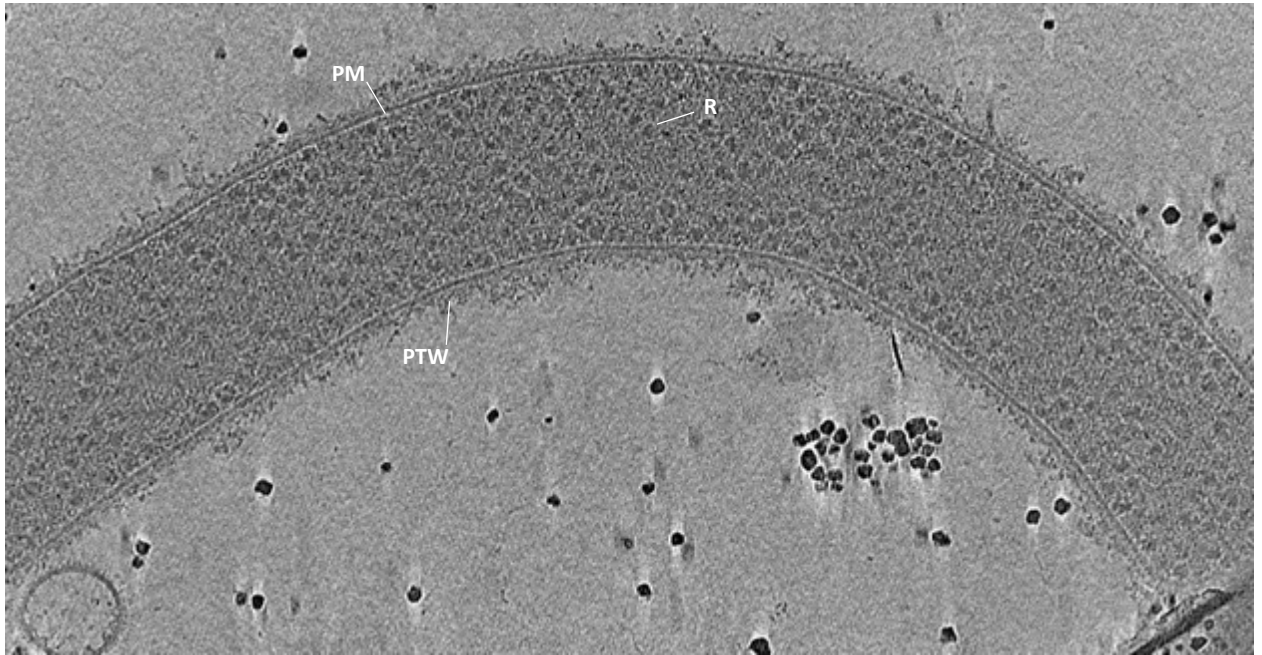

**Supplementary Figure 1 – Slice through a tomogram of a polar tube of a germinated *S. lophii* spore.**

PTW, polar tube wall, PM, plasma membrane, R, ribosome.

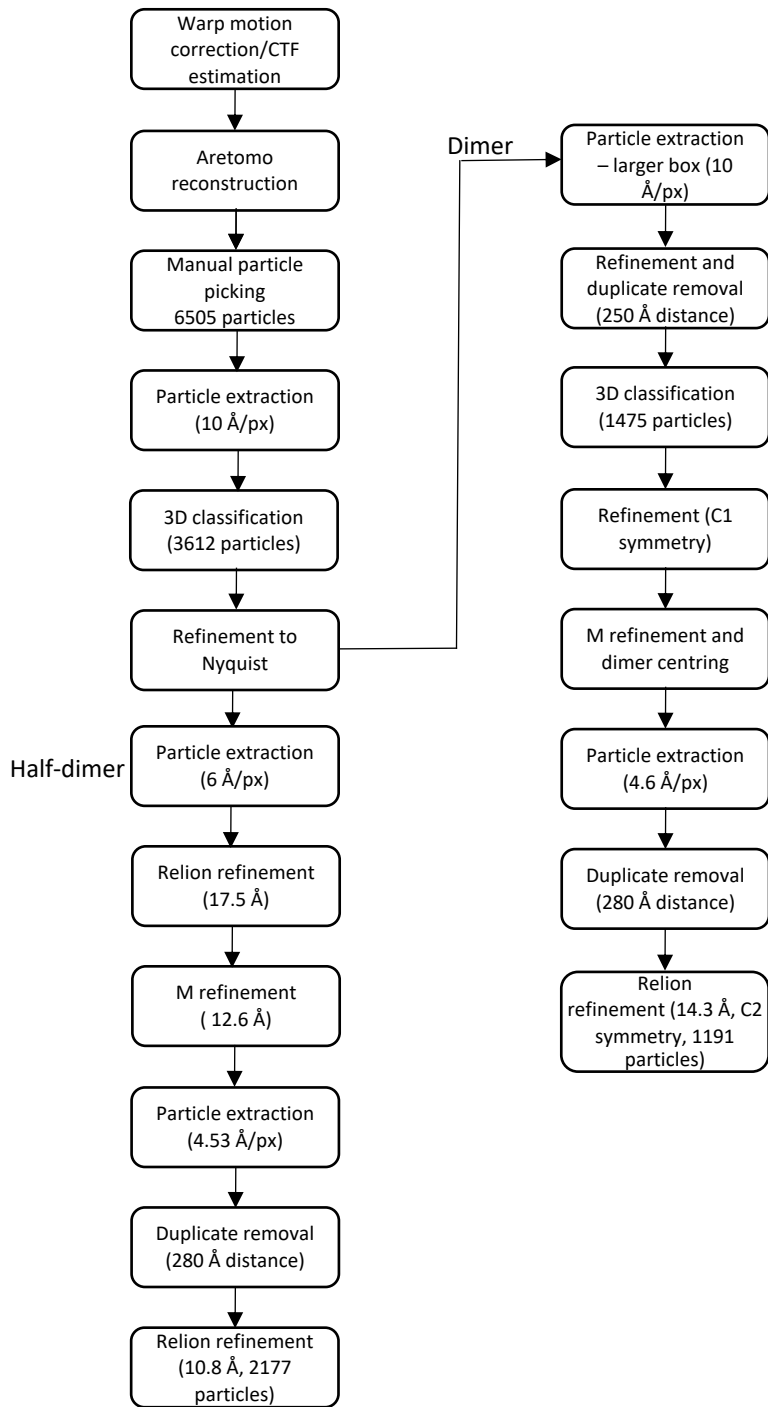

**Supplementary Figure 2 - Flow chart of the subtomogram averaging pipeline.**

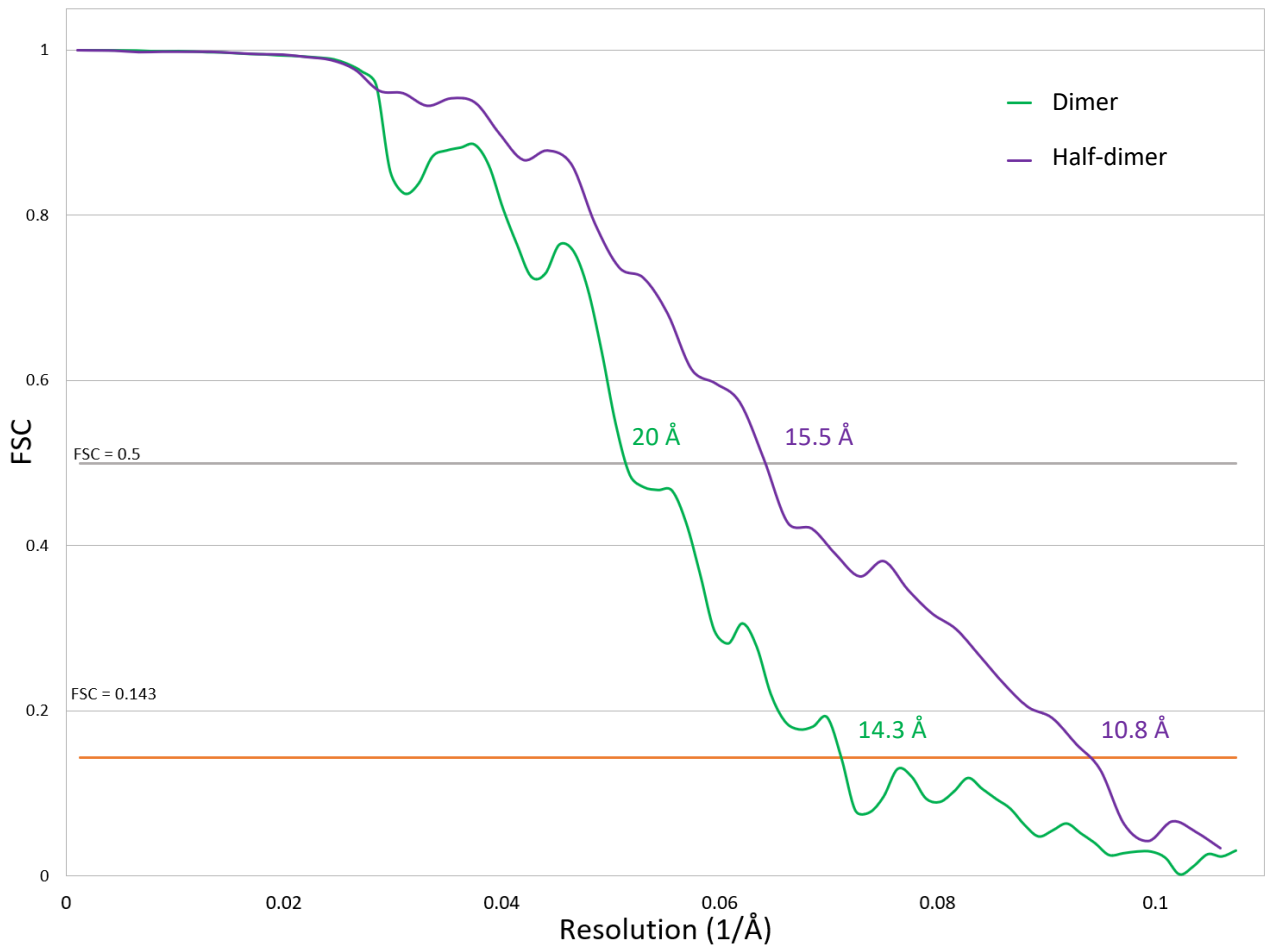

**Supplementary Figure 3 - Resolution estimation of the *S. lophii* ribosome dimer and half-dimer maps from subtomogram averaging.**

Gold Standard FSC of the dimer (green) and masked half-dimer within the average (purple).

**Class 1**  
(449 particles)

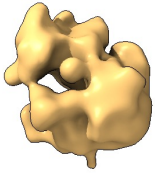

**Class 2**  
(934 particles)

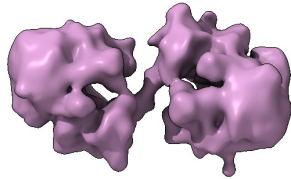

**Class 3**  
(541 particles)

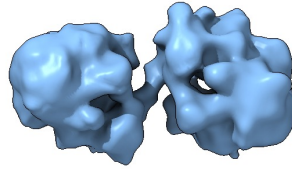

**Class 4**  
(283 particles)

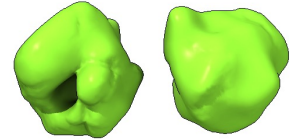

**Supplementary Figure 4 – 3D classification of subtomogram average.**

Out of a total of 2207 particles post duplicate removal, 449 particles contribute to a monomeric class (20%). In all 100 S dimers, the 70 S ribosomes adopt the same orientation with respect to each other. No obvious differences were observed between classes 2 and 3, and these were combined for further rounds of refinements.

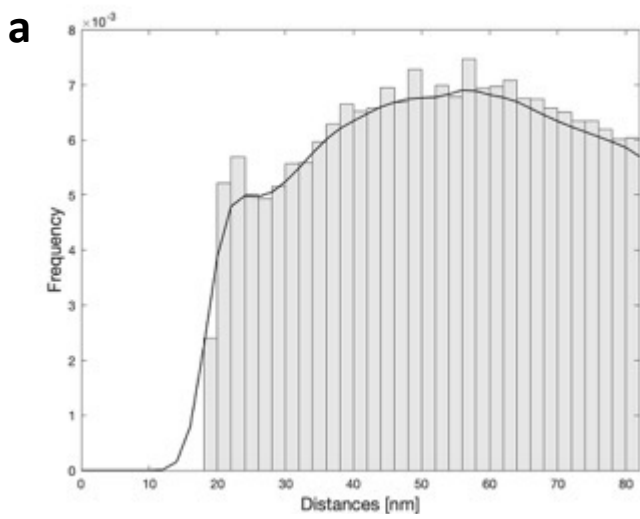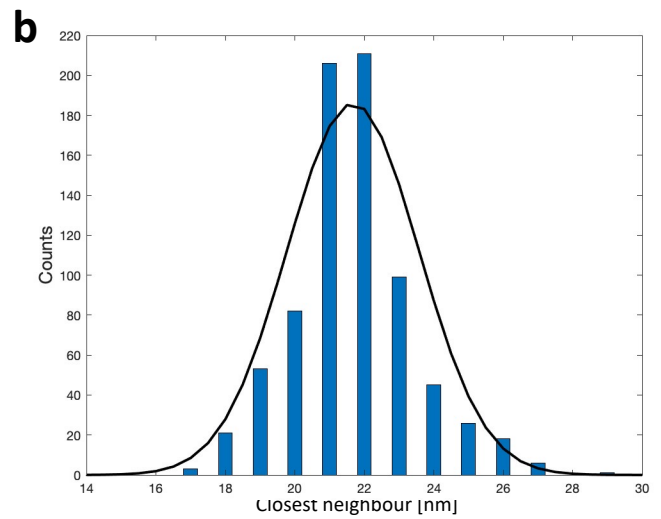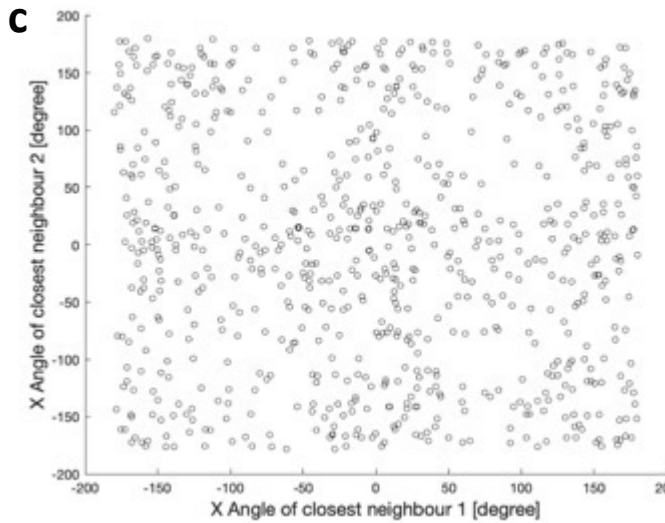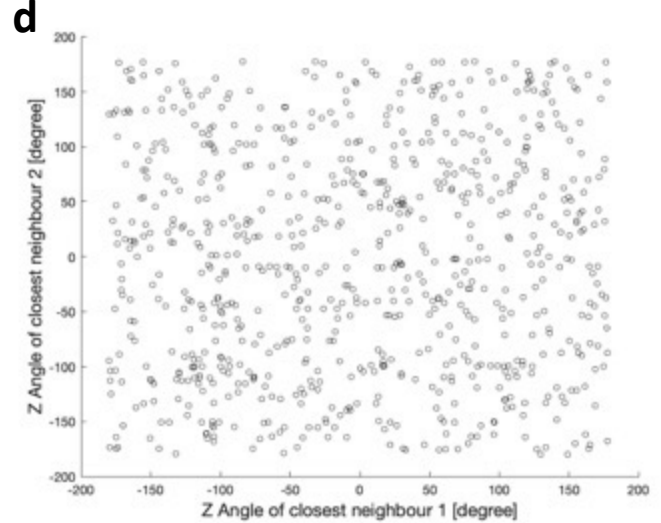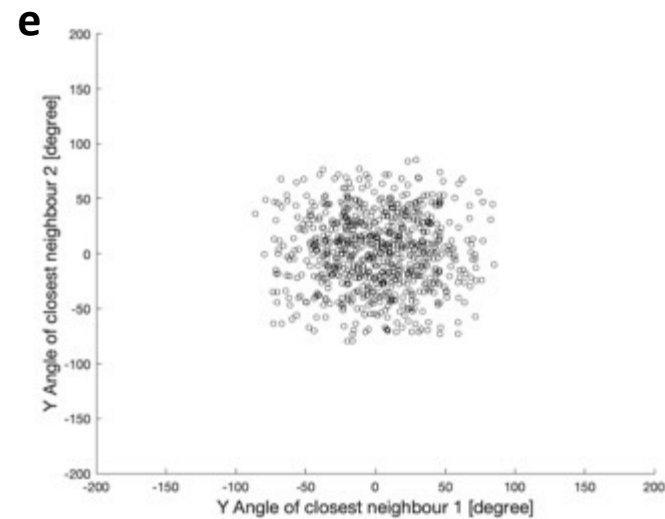

**Supplementary Figure 5 – Statistical analysis of ribosome distribution within the polar tube.**

**a** Histogram of distances between 70 S particles in a PT with a peak at around 21 nm, corresponding to the centre-to-centre distance between two partners in a dimer pair, or ribosomes in touching distance. No other peaks or multiples of the average distance between partners that could account for the presence of polysomes are evident. **b** Histogram showing only the distribution of distances between closest neighbours, with a peak at around 21 nm. **c-e** Angular relationships between closest 70 S neighbours of all particles. Scatter plots of the X and Z angles do not show any correlation and are randomly distributed between  $-180$  and  $+180^\circ$ . The Y angles of closest neighbours (i.e. dimers) of all particles range only between  $-90$  and  $+90^\circ$ , which is likely a manifestation of the relatively fixed angle between two 70 S particles within a dimer. The sample size was 771 ribosomes taken from one representative tomogram. Ribosomes were manually selected and subsequently aligned with an estimated accuracy of  $10 \text{ \AA}$ , corresponding to the resolution achieved by sub-tomogram averaging.

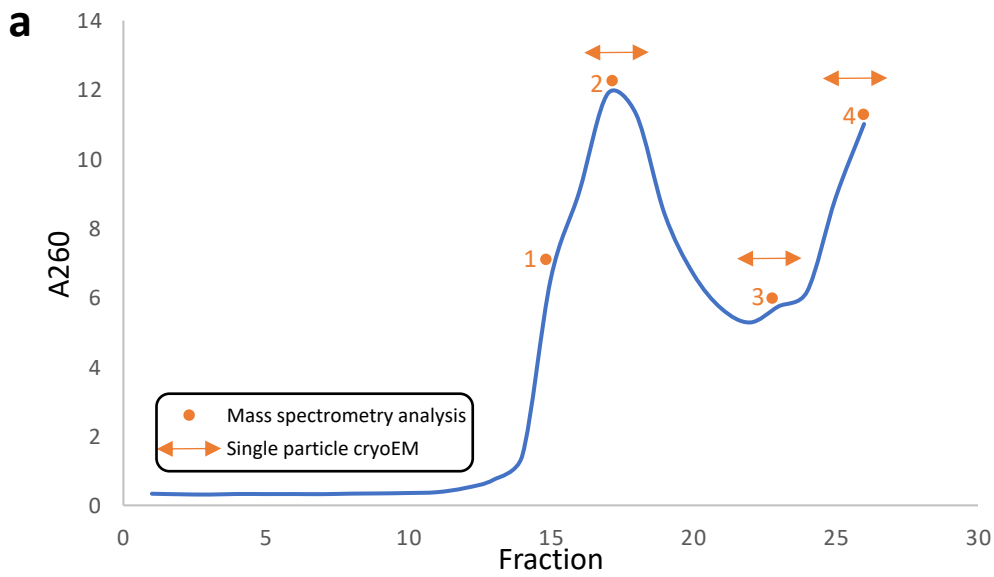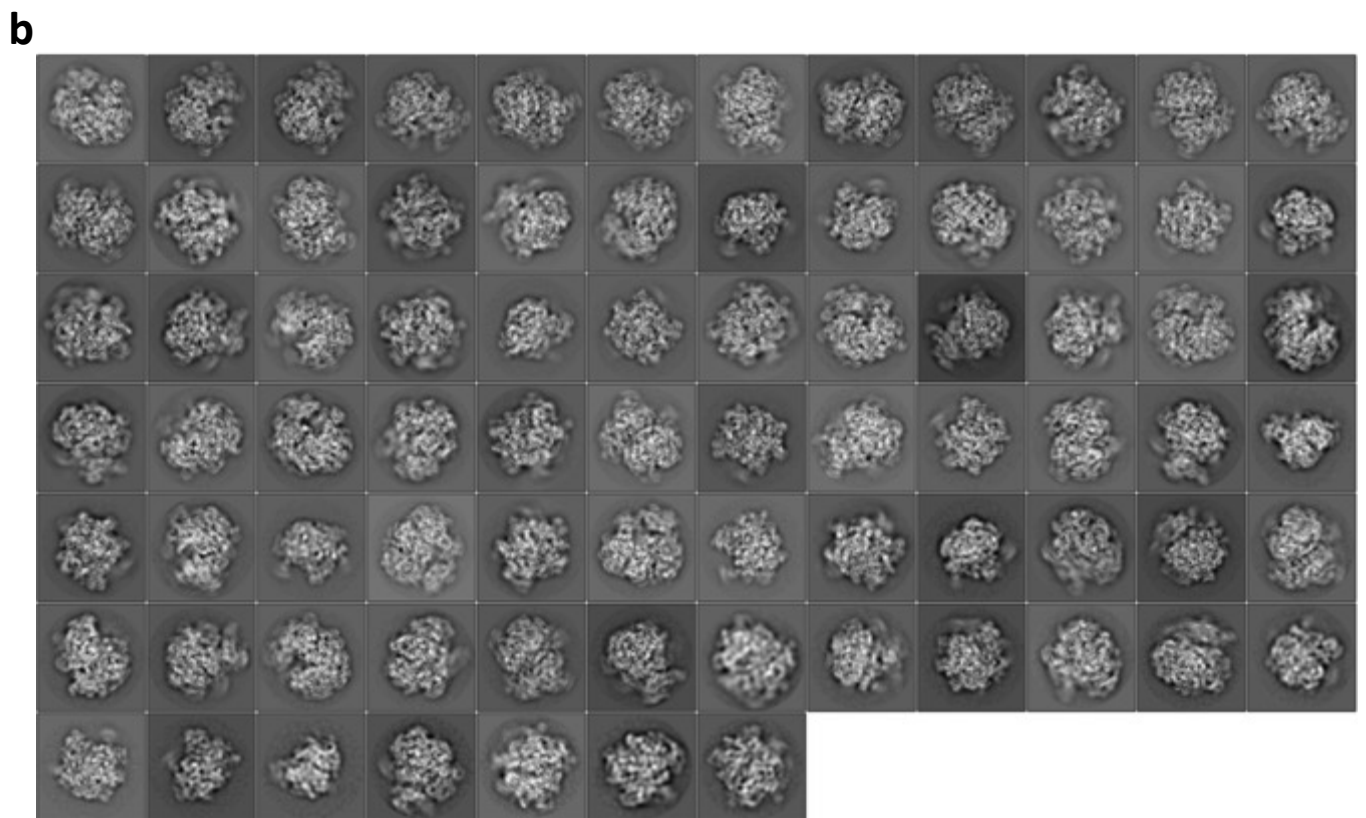

**Supplementary Figure 6 – Purification profile of *S. lophii* ribosomes using a sucrose gradient.**

**a** Purification profile. Samples taken for mass spectrometry analysis are marked with an orange dot, and the peaks investigated by cryoEM are shown with a double-headed arrow. **b** 2D classification of cleaned and polished single particle dataset.

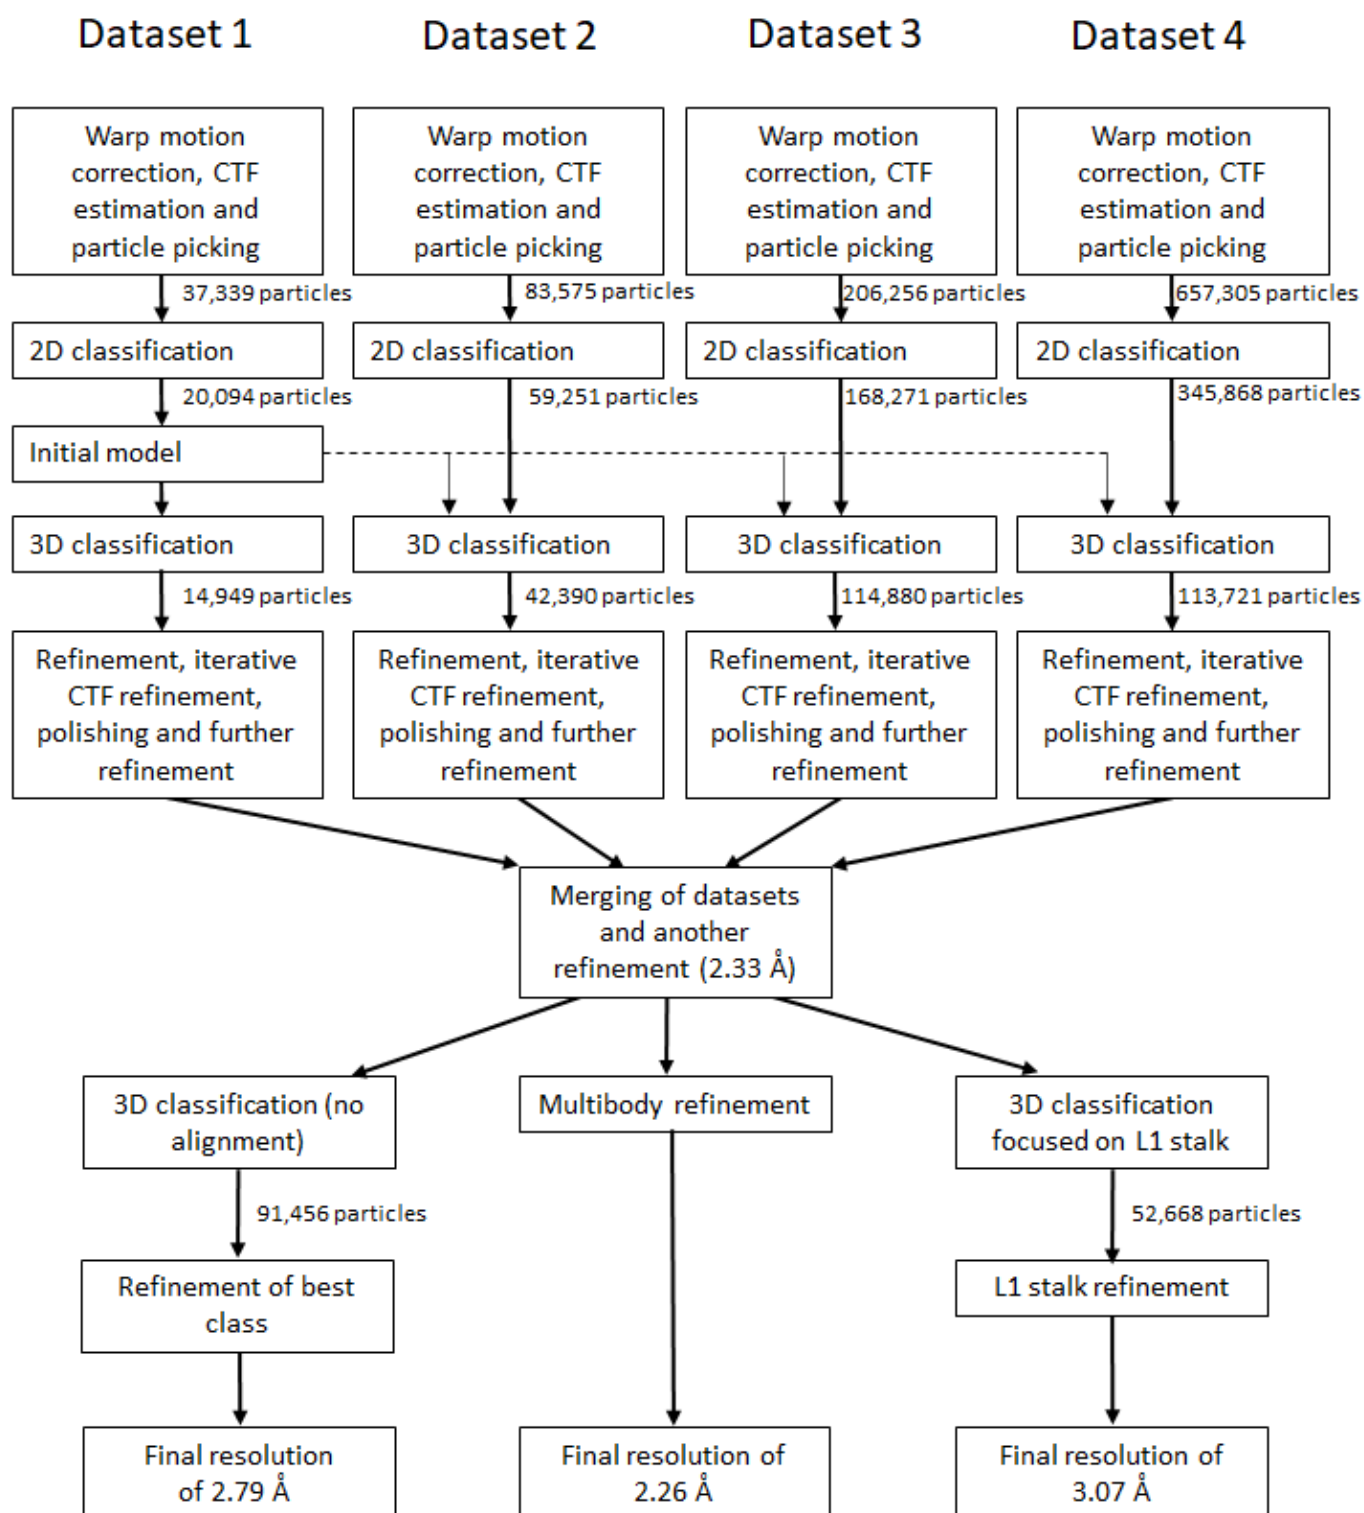

**Supplementary Figure 7 – Flow chart of the single particle processing in Relion .**



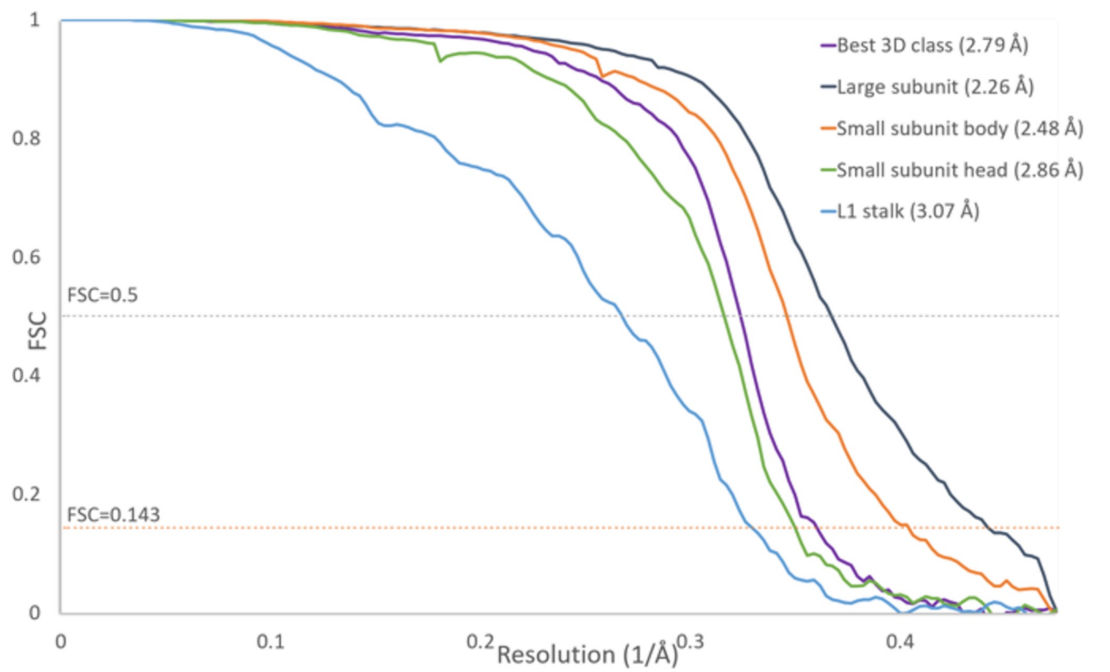

**Supplementary Figure 8 – Gold standard Fourier Shell Correlation (FSC) of the single particle data.** Purple, best 3D class; dark blue, large subunit; orange, SSU body; green, SSU head; blue, L1 stalk. Indicated resolution values correspond to the FSC 0.143 criterion.

| Universal Chain nomenclature |     | Template | Sequence                                                                                                                                                                                                                                                                                                                                                                                                                                                                                                                                                                                                                                                                                                                                                                                                                                                                                                                                                                                                                                                                                                                                                                                                                                                                                                                                                                                                                                                                                                                                                                                                                                                                                                                                                                                                                                                                                                                                                                                                                                                                                                                                                                                                                                                                                                                                                                                                                                                                                                                                                                                                                                                                                                                                                                                                                                          |
|------------------------------|-----|----------|---------------------------------------------------------------------------------------------------------------------------------------------------------------------------------------------------------------------------------------------------------------------------------------------------------------------------------------------------------------------------------------------------------------------------------------------------------------------------------------------------------------------------------------------------------------------------------------------------------------------------------------------------------------------------------------------------------------------------------------------------------------------------------------------------------------------------------------------------------------------------------------------------------------------------------------------------------------------------------------------------------------------------------------------------------------------------------------------------------------------------------------------------------------------------------------------------------------------------------------------------------------------------------------------------------------------------------------------------------------------------------------------------------------------------------------------------------------------------------------------------------------------------------------------------------------------------------------------------------------------------------------------------------------------------------------------------------------------------------------------------------------------------------------------------------------------------------------------------------------------------------------------------------------------------------------------------------------------------------------------------------------------------------------------------------------------------------------------------------------------------------------------------------------------------------------------------------------------------------------------------------------------------------------------------------------------------------------------------------------------------------------------------------------------------------------------------------------------------------------------------------------------------------------------------------------------------------------------------------------------------------------------------------------------------------------------------------------------------------------------------------------------------------------------------------------------------------------------------|
| rRNAs                        | L50 | 23S_rRNA | 6RM3<br>AUACCACACACAAGGGAUCGUUUUGGCUCUUGGACGACGAGGAAGGGCGCAGCAGAGAGCGAUUAUGUGUGGGAGCAGC<br>AGCAAUGACCACACGUCUCCCCGAAUACAGCAUAGUGCUGGAGUACUCCUUGGAAUUAAGCAUAUGAGUAAAAGGAAG<br>GAAAAGAAACUAACGAGGAUCCCGUAGUAGCGGCGAGUGAACAGGGAAACAGUCCAACAGUGUAAUUCUCAAUUG<br>AGAAGUUGUCAAAAAGGAAGAAGAUUGAUAUCAGAAAGAAAAGCUGAACGAUACAGGGUAGUAGUCCCGUAGUGU<br>CUUCUUAUAUACGGUGAGUAGCUGUGCUCGGUAAUGCACAGUGAAGAGGUGGCAGUGUGCAUCUAAGACUAAAU<br>ACAACAGGAGACCGAUAGCAAAGAAGUAGGUUGACCGAAAACAUUAAGUGAAAUUUGUGUGUGGACCCGAAUGGA<br>UCGGGCCCGUCUUGAAACACGGACCAAGGAGUGCAUAACACUGCAAGUUGAGCAGAGGAAGUCUGUGAGGGCUA<br>GUGAAGACGGAAAGCAGUGAGUGCGACCCGAUAGACUUGUGAACUAUACCUUGUUGCUGUGAAGGCUUGGCGA<br>AAGCCAGCUGGAGGCGGCAAGCCGUUUUGAUCUGCAAUUAUGGCGUUAAGCAGGGUUAAGGGGCGAAAGACCAA<br>UCGAACAGUCUAGUUGCUGGUUCCUCCGAAUUGUCUAUCAGGACAGCGCGCACGACAGAGAAGCAAGGUAGAG<br>CAUGGGCCGGUACCUUAAGGAGACGGACGAACUUGCGAAUGUGCUUUUUCUUAUGCAAAGCGUAGUGGGCGAGU<br>UCUGGUAAGCAGGACUGGCGAAGAGGAAUGAACCCUGGCACUGUGCUAAGGAACCCAAUGUCUGGACAGAGACCGA<br>AAGAGGUAGGUAUAAGGACGGUAGGGCGGUAGCCAUGGAAGUCGGCAUCCGGUAAGAACCGUUAACAACGU<br>ACCUACGGAAUUAUCUGCUUGAAGAAUUGAUGGCGUUAACAGACAUCCGAUUGCACAGUUAAGGAGGAGGG<br>CGUGUGUCUACUGGCGAAGGUACCGAGUGAUCGGUGGGUAGAGUAGCAGAGCAGAUUCUGGUGGUAGUAG<br>CGAUAAUUGUCUUCAGCGCAAAGACUGAGGAGGAGAAGGGUUUCUUCUAUAAAGAAGAGUGAGCCGGGUCUA<br>AGCGAGUGUGUAGAAGCAUGAGCGAAGGAGAAACAGGUUGAUUAUCCUGUGCCUGUGCUGUCUACGGCAACGU<br>GUUAUAGCUUGUCGACACGAACAUCUAGACAAAGCAGAAACACCUUUUCUGUUAAGGGGAAAAAGACCACUGAG<br>ACGGAUCAUCUGGCGACGUGGUUUUAUCUCUGUAGCCAGGCCUGAGCCUGGUUUUGUUGAGGAGUGGUCUCCAU<br>AAAAGACAACUAUUAUGGCAGCACAGUCCGUACCAACCGUAUCAGGACUCCAAGGUGAAGGCCUCUAGUGGAUGU<br>UUUJACACAUUAAGGGAAUUCGGCAAAUUGGAUGCGUAACUUCGGGAGAAUUGGUUCAAUUGUAACUCAU<br>UGUGACAAGGGAAUCUGACUGUUUAGUAAAAACAUAAGCUUCAUGAAGAGAGAUUAAGUUGAGUUCGCCGGUG<br>CUCGGUCUGACACGGAGGAAUUGCCAGAAAGCAGGGUUAACGGCGGGAGUAAUCUAGACUCUUAAGGUAGC<br>CAAAGCCUCUGUCAUUUAAUUGUGACGCGCAUUAUGGAAUGGAUAGCAUUCGCAUUCAGUUAAGACU<br>GCGAACCACUUAUCCAGGGGAACGGGCCUGGACGGCCAGCGGGGAAAGAAGACCCUGUUGAGCUUAGACUCUAGUGU<br>GGCCAAUGUUGAGCAUUGAGGCGAUUGAAGGAGGUGGAGAGCGCAAGCAGAAGUGAAAGACCACUGCGCCAU<br>AUCUACACGACACACUUGUUUAAAGGACAAAGGCCAGAUUGGGGAGUUUGGCGUGGGCGGUACGACCACAGAAUCAG<br>AACGUGGUCGACCGAAGGUACUCACAGCGAGACGAGAACACUCUGUAGAGCAUAAGGACUAAAGAGUGCCUGAG<br>UGUGAGCACUACUGCUUGCAUAGAGGGGAAACCCGGGCCUJAGCGAUCCUACGCAUACGAGACACUUGUGGGCGUGGG<br>UGUCAGAAAAGUUAACACAGGGAUAACUGGCUUGUGGCCCGCGAGCGUAGAAAGCGACGCGGCUUUUUGAUUCU<br>UCGAUGUCGGCUCUUCUAGCAUUGGCCAUGCAGCCUGGCGAAGUGUUGGAUUUUUACCCACUUAACAGGGAAAC<br>UGAGCUGGGUUUAGACCCUGUGAGACAGGUUAGUUUUUACUACUGUCCAACAGUUAAGGGGAGUGUGGAU<br>UAGUACGAAAGGAAACCCACACGUGACCUCUGGUGCAGCGGGUGUGCGGAAGUGCAACUGCCAUGCUACGUCUCC<br>UCAAGCAUAGCUGGAAAGCCUCUAAAGCUAGAAUUGAGUCCUGACUCUGGAAGACGGCCGGGAAGACGCCGUA<br>UAACAGCGGUGUUGUACGAUAUGAGCUUUCUAUUUGUGUAGUAGCGAGUUAUUUGAGACACUGGUUUGUUAACAC<br>CGUGUUUAU |
|                              | L70 | 5S_rRNA  | 6RM3<br>AGTTACGGCCATATCTACTGAAAAACACCGGATCCCGTCCGATCTCCGAAGTTAAGCCAATAAGAGCCATGCGAGTATTA<br>AGGTGGGCGACTACTTGAGAAAGCGTGGTGTGTAGTTT                                                                                                                                                                                                                                                                                                                                                                                                                                                                                                                                                                                                                                                                                                                                                                                                                                                                                                                                                                                                                                                                                                                                                                                                                                                                                                                                                                                                                                                                                                                                                                                                                                                                                                                                                                                                                                                                                                                                                                                                                                                                                                                                                                                                                                                                                                                                                                                                                                                                                                                                                                                                                                                                                                                |
|                              | S60 | 16S_rRNA | 6RM3<br>ACCAGUUGAUUCUGCCUGACGUGGAGUAGUCUAGUUAAGCAUAGAUUUUAGCCAUUGAUUGUUAAGCGAAGCGAUUAGU<br>GAAGCGGCGGAAGGCUAGUAACGGGCGAGUUAUUUAUCUCUAGAACCAGGACAACCUAGGAAACAGAGGGGAA<br>ACGGAGUAAGAGCAUGUGUUUGUUAAGCAUUGAUGAGAAACAAGUAGCAGGAGAGUUAAGAAGCCAUCCAUAGU<br>UAGUUAAGUAGGGUUAAGGGCCUUAUUUAGACGUAGACGGGUACGGGGGAAUUAAGGUUUGAUUCCGGAGAGGGAGC<br>CUGAGAGACGGCUACCAGGUCCAAGGACAGCAGCAGGCGGAAAUAUACCGAAGCCUCCAAGAGGGCGGUAGUGA<br>AGAGACGUGAAAAACAAGUUGUGUAAAAACCACUAGUAGUUAACUGGAGGUUAAGGCUUGUCCAGCUGUCCAGCAUCCGCGGUA<br>AUACCAGCUCAGGAGUGUCUUAUGAUAUUGCUGCGAUUAAAAGGUCCGUAGUCGAGAAGCAGUACUUGUUUGU<br>AAUGUGGCUUAUCGAGAGCCGAUAAGAACGAGAAGAGUUCAGAGUAAGGAGCGAAGGAGGGCUAGAUUAUUGAG<br>CAGCGAGAGGUGAAAUUUGAUGACCUUCUUAAGGAGUAACAGAGGCGAAAGCGCUAGUCAAGAACGAAUCCGAUGA<br>UCAAGGACGUAGGCUAGGAGUAGCAAGACGAUUAAGACCGUAGUAGUUAAGCAGUUAACGAGUCCUACGUCU<br>UGUGUUUAUGACGACGGCAGAAAGAGAAUUCUAGUAGGGCUUUGGGGAGAGUACGCGCGCAAGCGAUAAAUUUA<br>AGGAAUUUAGCGGAAGAACCACCAAGGAGUGGAGUGUGCGGCUUAUUUAGACUACACGCGGGACAGCUUACCAU<br>ACCCGAUGGCCGUGUGAGCGUAGUACGCGAUAGGUACAGAGUGGUGCAUGGCCGUUAACGACGAGUGGGGUGA<br>CCUUUGGGUUAAGUCCGGAAGUAGUGAGAUCCUAGGUAACGAAAGUUAUCGACAGGUGUUAAAAACACAGGA<br>AGGAAGGGGCAAGAACAGGUCAGUAGUCCCUUAGAUUGGUUAUGGCUACGCGCACUACAGUGGUCACAGCAGA<br>AACAAUAGAAGUAAAUGUGAUCGAGAGGGAAUAGCACUUAUUGUGCAAGGAAAGGAAUUGCUAGUAAU<br>CGUUUAUCUAUUAAGAAGCGAUGAAUGUCCUUGUUCUUAUGUACACCGCCCGUCGUUAUCGAGAUGGAACC<br>AGGUGCGAACAAGUGAAAGCGAGUGAGUGCAGGGUUCUAGAUUCGUAACAGUCGUAACAGGCAGCUGUAGGA<br>GAACCUUGAUCUGGAUCAACUAGUUAUU                                                                                                                                                                                                                                                                                                                                                                                                                                                                                                                                                                                                                                                                                                                                                                                                                                                                                                                                                                                                                                                                                                                                                                                                                                                                                                                                                 |

Large Subunit ribosomal proteins

|     |      |                 |                                                                                                                                                                                                                                                                                                                                                                                                                        |
|-----|------|-----------------|------------------------------------------------------------------------------------------------------------------------------------------------------------------------------------------------------------------------------------------------------------------------------------------------------------------------------------------------------------------------------------------------------------------------|
| LAO | uL2  | 6RM3            | <u>MGKVIRTLRLQKEHVKRKHHSKSGIVGFPPTLKNCEATVEKIVHESGRPAPLAIINYKKEEKNTKGLLVAIEGIYEGQKIQIGENASLELGNVCPIKEPEGLVSMVEKPKDGGYKVSPPGCVATIVYHNKLTNQTTIKLPSGERVVRTGESRALLGIIAGGGKDDKPLLKAVNAYKYKTKGKPPWPRVGVAMNVPDHPHGGGNHQHVGHPTTVSRNAPVNGRVLVAARTRGRKKGSRKIVTVN</u>                                                                                                                                                             |
| LAA | uL15 | 6RM3            | <u>MFNKKSKSRKLRGHVSHGYGRVGRKHKRHPAGRGKSGGLKHLRSLFORYPHDPHFRKLGIVMFHRNKNADFTRTVNSVNLWGLMKLEEQMKFKSSAEVPPVDCRNYGYLKVLLGGDLISVKKPIVVIARQFTKDAEEKINAVGGKCVVAA</u>                                                                                                                                                                                                                                                          |
| LBO | uL3  | 6RM3            | <u>MSCRNYSAPRHGSLAYCPKRAKTKPAIKSFPKDDASKPVHLTGYLAKYVGMTHVVRLSTRRSKTERVLKETQKEVLDVAITILEVPAMRIFGMVGYKSTVNLGKAIKTVYAEHLDEQVRLARLKRNSRSSKLMFKLYPQKYENGDIKRDYELLKRESDVVRVLAHTQVSKIPSLNKKAHILEIQLNGGTIEEKIEWAIERLEKIEPVEVFSQQDLIDIVGVTKGGKGETTKRFGTITLQHKSRKGRKVCAGIWAHPANVRRTVARAGQLGFHRRTAQNKKIYMMNGKTFPSTEYDLTSTINPMGGFLRYGNVKSDFIMVKGGIQGSPKRVLALRKAFAFNSLGDNEEIVLKFVDASSKKGYGRFQTTEEKAYFGIKAEVVEQ</u>                  |
| LCO | uL4  | 6RM3            | <u>MSRQVNIIEQDSSSRTTSVPAVFNLRVQDLISFTHKNVAMNSRQPYAVKPGAGMRHSASWGTGRAMARVPRVAGGTTRRAGQGANANFCRGGRMFAPTNVNRRVNRKTLISRRYASAMAVAASTIPAYVEGRGHRIEQIENIPLVLSNKIDTETKTEGKILYNLGLKEELDKEESKNIRAGKGWNRNRYVLKKGPLFVYTSSETSFTKAI RNIPGVDTERVE NLSILDAPGGQAGRLIWMEDAFEKLEIYEGEMNEESFKKGYTMGMDDVAENIDVENIFYSDEVEQFIDIPNFIKDKKMMVEKKNLAEIQQVVEIEERI</u>                                                                              |
| LCC | eL30 | 6RM3            | <u>MSRKRKREESFVDKLPALKTKGVNLGFKESLKSLEKTKLLILTSNFSPIKRKTLEYYAASNNTPIYYDGSNNDLSKNCCKGYFRIGVISIQDFGEADLMNAMAQA MVSNSINFQSDNKSYSYQRFQTKKRRRLRCKTNYRRRTKLKLDQKNVGEDKSRVVRITNSKVICQVVVSKLGGDMVVAQATS AELKEFGLKVGFTNYSAAYATG LLLCARKILMEKLDNIYKPKFCTD VDVVEDIEGKNA YRCYLDIGLSRNSKGA KFAAMK GASDGGIKIPYSPKIFPGYNKDEEFDQQLDRIFRIGKEVAN YMQLLKKEDETKFKKQFSEYIKQNIINAEDLEKMYENL FNSVITKEISKHEKKDYSAKKYKVMKLTKEERDARVOQKLVENN</u> |
| LDD | eL31 | 6RM3            | <u>MAFKDDKAIELTIPMGKITIDVSKRWKCRIGIRRLKFKITFTFHDKAEAVQISPDNLKFLWGERMNRVPRKRVRVVNQEPYKPKDSKVVYKLSHVVVSTFKGLGTEAIAE MQSERQQRLNINIKNYTADDIPAEAKLQLHLKHPAPIELRTDVLVQGNVVVLEGEYASRVVYLSRTEDNKALCMGLPSINGIGLFEIDERFLRTSIVLDIRLDKKYRA KESKRSFKFNTKEKLVTEENDEI ELLLKEIENEKFMKYYFETPTYPEINNTVDVYIENH</u>                                                                                                                        |
| LEO | eL6  | 6RM3            | <u>MDIVNPSLSKVIDIINKGSKKQKRFQSWRVKRVSESWRKRPRGIDNRMRKFGGAPDMPGIGYKKNPNAIRFLPNGRYKIMVACVKDEALISLNSFYCAEIRHAVGSKKRILEERA EELGILVINKEGLKVFEEEE</u>                                                                                                                                                                                                                                                                        |
| LEE | eL32 | 6RM3            | <u>MSNVDLIAKKEQYNLRMEELQKQEQEHLKRV EENKYYAEKRTVELLETYK KIAL EQQLSEERMQKENKIYAPKDPHFYAVVLIKSPLRASNKIKTLEFLRKHINNCV LVKNNESSRQMLQKIRNFVAYGELKLTRELIYKRGSC HIFSEKLNITNETLEDAFNKIRCEEFYELVFNDRFERKELNLFNLNPFKLT PPKGGYKGRKADIEGGAVGNH QDKIGELIKKMI</u>                                                                                                                                                                     |
| LFO | uL30 | 6RM3            | <u>MEVIKIKELKERVCAKGLTYSHKRSKNYPRYSLTIENVTREAA M KYVGN AVELFKPESTKEESHIGIIKAVHGRSGAVRAKFSRNI SPVEMGSKVYIKYKMNEDI MSDIQLTKQLLSSMNPRLTNKAMDMTRKEVIATRKEALVNAIKLPPALNQVTNYLSEEDLKEVSDLSKFRPETERKERQRLQNERKGPPIIVKQGIKHVTKLIEEKA KFYLIACDVPDIEVLYLPTLCVKGPIYALVTKEDLGKIIKKPTTCLCLCDVSSDIKSFENVI AKCNGQFKDNYESAMKVVWGSPEKVEKKE</u>                                                                                          |
| LFF | eL33 | 6RM3            | <u>MVERQVVRGGSTFNTSRNKRKVRTPGNRLVFQDVKKKGGKPGCGQGIKLAGVKEARPAAFSRMRKSRKRVNRLIGVQCAKCVQEKVLDALFNAEEKRMELE V</u>                                                                                                                                                                                                                                                                                                         |
| LGG | eL34 | 6RM3            | <u>MVYVYVEEKVQIPEGCKVEVNVKVTVTGPKGTYSKDFSHIFVDIHEENVRCLWNCRKQERSKLITCSKLIKNMIDGSMGYFELKAAKYHPITFEIKENGLLIV KNFLGQKWAREFKMIGDTIIKQGVTKDHLILEGISKEDVSO TAGLIQNCLPKNLD RRRIFQDGVYIATKGLIEVK</u>                                                                                                                                                                                                                           |
| LHO | uL6  | 6RM3            | <u>MKLLAKDLRNNISIEELEKNLVDAKSEMLQIRQKQSAILKPNELNRGNRRNVAVILTIIREKYYQLLEKYDADNIPKELKPRMNRKRQELTKKQKISKVGTKLYTKGNKLIYAF</u>                                                                                                                                                                                                                                                                                              |
| LHH | uL29 | 6RM3            | <u>MGRRRPGRCYRYCKNPKYISRFRCRGVDPDKIRIHDLGNKNAPCVDLPLNVNLISYSKEQLSSESLESARIAV NKYMMVNAGKDNHYHRINVHPHYHLIRINKMLSCAGADRLOQTGMRLAYGKPYGAARVRFQRORISIRTKDSNLK MAMEALRRARYKFPKYEVQKSN EYGFSGIERSQFEELKNNKGLINMGDHWKIIKEKGTVERVYVLCENAIQ</u>                                                                                                                                                                                  |
| LII | eL36 | 6RM3            | <u>MKINKLNNASKALSYPVKLAKTEKAPL TEKQQRSKELKFA MSIAREVGGLAPYELRATELLRRDEDKRCCKFMKRLGSLMAKKKIELLAEMRA MAEENPMNKIKIQKLCNICTGGGEILNASKVLEQLTGQKPRLSKSLRTIRSGIRREKIA CHVTVRGEKAMEILEKGIKEYELIDSNFSTQSGSFGIKEHIDMGIKY EPDVGIFGMNFYVLEKPGIRVSKRRKRVSRVGNKQRVTD EAKNVFVKYEGIVLKG</u>                                                                                                                                            |
| LJO | uL5  | 6RM3            | <u>MSKGTSPNGKKNRHHTCCRCGSVSKQKGCSSAYPEKMKMKMQRNKA MLKTTGTGKMRHMKKERISRRAGYPGNPILKEIRNKIKS MRGNQMLPNNHFNKSGMFKNWFNQPMRALRKRKEVREQSKICYPNPLKLRPVVRCSSMRYNKKVRLGRGFTKMEIEKAGMDIKYAVISGVIADLRRKNKNEE</u>                                                                                                                                                                                                                   |
| LJJ | eL37 | 6RM3            | <u>GLEENVKRLMDYKNLKFETT VREARDNKIEYQKGEIMKPVNIIPEVKGIKVEEIIATYGN</u>                                                                                                                                                                                                                                                                                                                                                   |
| LLO | eL13 | 6RM3            | <u>MGSIKTRRIKQVLSALKNRCIPQWKRACPGFKQYNYFTKRSWKRTLKAC</u>                                                                                                                                                                                                                                                                                                                                                               |
| LLI | eL39 | 6RM3            | <u>KYFSYPLMYFIKPGCLIKKFSIYTSIVISVIDNNSVVIQSYDSDNGDVISIDREVENSVKIPIGNIDIKNKSKEIDGILVEENRNLKNKDDVLLMNDFERFEQLKKEVED</u>                                                                                                                                                                                                                                                                                                  |
| LLL | eL14 | 6RM3            | <u>MVIEEMA</u>                                                                                                                                                                                                                                                                                                                                                                                                         |
| LLO | eL14 | 6RM3            | <u>MQLFLKSPNGTSTIDLALENTLNVLTNEGTVSTENNRFIYNGKQMDTNRCLFSSYFGKLETIYTVTRIGCGKLTDDDKVLAITKFEKQVCRKCYARLPIRATHCRKRACG YSKLGRGKKRRDESK</u>                                                                                                                                                                                                                                                                                  |
| LMM | eL40 | 6RM3            | <u>MGYQLYKIEIRRDQSSVMRYLLRVRVWEYRQNTAIHRASGPTYLDKARMLGYRNPICMFIFRARRVRRGARPKVKLGNTHGKPSKSGVYQRKPAKRLQFAEIRVGRKCSNMRVFNYSWVVGQDRVYKYFEVIMVDPYCDRIKNDKKNWLCPKVPMKHREARGLTNGTKTSRGLGKIRYNTQTKGGSKRAAWRNRRNTQSLRRYR</u>                                                                                                                                                                                                    |
| LNO | eL15 | 6RM3            | <u>MIGKRIVDAIGHVAGLAGHIAKELMCGIEVIVHAENVMFTGPIKRGVGFNSHLNKS CSYNPLRGPFFHLRSPSMHLMKVIKRLPHRKSQGIKALRLOVDFGCPTEYLSVEKMVCPDRDKLEYTTSPIRKS YLGDLMIKFGWKYESVVEKMNQNEEFQKIEETEKQVKVKEQKIEELKSNKFFQQRVEEIMVQMA</u>                                                                                                                                                                                                            |
| LOO | uL13 | 6RM3            | <u>MVNIPKTRRTYCIKAYHTEFKVGLLKKGKDSPRKQGARRYARKQRGVHGQTKPILKRAKATTKVKVILKIECTCKSSQLKVRGRAKHVEFGAEKVKGEALY MAHKYSCDISEATSVRSQYNNIKIFKNTREVCNIIKT MELNKA IAYLNDVLRFFKCIPIVFRFAKKGRTPAKAEFGTDKGGKWPVKSVA FVKMLLEDLLEAEKGLGT SELVIKHQIWNQAPKIYGRKHGAFGRIPYKNSPSHIEVI AVKREHNIKEGDVVEVKE</u>                                                                                                                                 |
| LOO | eL42 | 6RM3/Alphafold2 | <u>MSRKTKVGITGKYGSRYSGLKRRAMICMNAQSKRYCCSFCGKTTVKREVIGIWSRCFRGKGVSGGAYVITNQVEYKQVINRMKME</u>                                                                                                                                                                                                                                                                                                                           |
| LPO | uL22 | 6RM3            | <u>MLKQKMFHEHYKKAIFDESRVPRTKNVFYQSLFSLYKVCENTENEIVHKITKRLTMSRTERHPKLSNIIIEQANGKEIVVFGVKVLDLDDKILEIPKITIVALKISQAKEL LTLNGGEFYLDLKFYSKLDKDALVKGDKNNRCKTRYFGASGDKSETYPRTRKGAARRGERRIKNKKK</u>                                                                                                                                                                                                                             |
| LPP | eL43 | 6RM3            | <u>MKLPVVKLSADILKCGVRRYIYLDTFEPSKLSAATSRRDIRKLIKDGLIVRKAQKIHRSYRANKLMREKEKGRHS GPGKVGSKNARMPEKDKWIKRIRDLRNTLKLRLD</u>                                                                                                                                                                                                                                                                                                  |
| LQO | eL18 | 6RM3            | <u>KGEITKTEHKMYQKTKGNGYKNSAALMGAIKQKHDDERRMKEIEEQAKALKIAASEK</u>                                                                                                                                                                                                                                                                                                                                                       |
| LRO | eL19 | 6RM3            | <u>MAINEYKVGIKIDDNGVGVDEVYAHIVFATNELLAKSFPNKILKQKIKPKNTKVIKVEIEKEDNKDLVKNYIDYIYKSKRCDHKYKFEFRGVS RCHAVDKLLCDIGGRHSVKNRILIFIMKVKELTVDEIKDKIKIFAMEDVEYPA YRNVLRNSKLFVSENEKLFN</u>                                                                                                                                                                                                                                        |
| LSO | eL20 | 6RM3            | <u>MVSSHGYYRRQTRNLFSQA FRKHGMPNTSYTLTVAYAGEYDIKVNPAIHGKMPHKHYHGRTGIIKEVNRGVSIVLFRNIRLANKTVERKVI GIEHIRKSKQDEYLRLEINKKIIIEAEKGEVPVLFKRQPKGPKPAVEMLMNIIELSYDKVESQ</u>                                                                                                                                                                                                                                                    |
| LTO | eL21 | 6RM3            | <u>MSEAAVQDQSITYLTDCTKCTEQSLFSTDDLKEYLLGNIKYNGKKGQGLGKVLVLSNTGHAVDVFVFAKTSKRYLYKLIKFLRAKGLSDVWRPIAGDKQSYKFFSKQA GEE</u>                                                                                                                                                                                                                                                                                                |
| LUO | eL22 | 6RM3            | <u>MPGKQKPLDAIKNRYGFTFRGIQVGTVLACADNSGAKMLKTIGVKVSGRLNRLPAAGPGDVIVASVVKGRSDMRKKIVLAVIIRKQKQKIRKDGVRLOFEESA AVI ISNKGDGLKGTQISGVLREVCDIWPKISSQAGSIY</u>                                                                                                                                                                                                                                                                 |
| LVO | uL14 | 6RM3            | <u>MFYEGTCVYSYVPRGKGTYSVFLDDKSSLFFSSKYKNSFDKIKAKRVKQTLMSKQFCGKVESVHTEKHKKIVVQKIVRGPALPDAVEKIREQNKDYKXKIVDEK VQHGGKVGKIEQKQMKQKQY</u>                                                                                                                                                                                                                                                                                   |
| LWO | eL24 | 6RM3            | <u>MPKLNRRHKASRLDKKIKQKLIKPLGFSLLDIKYGIGHEGAALKIEEAGTLTFVVQDQADKINVKKAFEEIYGEKVKVNNINNTMGVKKAYIRLVELGNAAVVATKAG IL</u>                                                                                                                                                                                                                                                                                                 |
| LXO | uL23 | 6RM3            | <u>MKFNKNVTASRRNRKHAFTSIGLERTKLMNAPLSKDLKEEYGIKRIARVPGDMVVKVSGFEKKGEGVMVKNRHDKIEVEGFCVQKEDGKKINKGIHPSNLRILKLS MEKDRAEIIINKVEAMKSEVKA</u>                                                                                                                                                                                                                                                                               |
| LYO | uL24 | 6RM3            | <u>MKPTFIIRINLFFPKYFFLFIHFFLFFIFFCPMSETLFEKNMFLVLLNRRGFRAGNKGIIVDLENNRIIAGVSKIPKNNKRTIVFLKKNMNMHIMATTYKRDIGLSLDNLSIFEDKVKKAVALNRVREIFNKNKNNEGFAWLYKLEI</u>                                                                                                                                                                                                                                                             |
| LZO | eL27 | 6RM3            |                                                                                                                                                                                                                                                                                                                                                                                                                        |



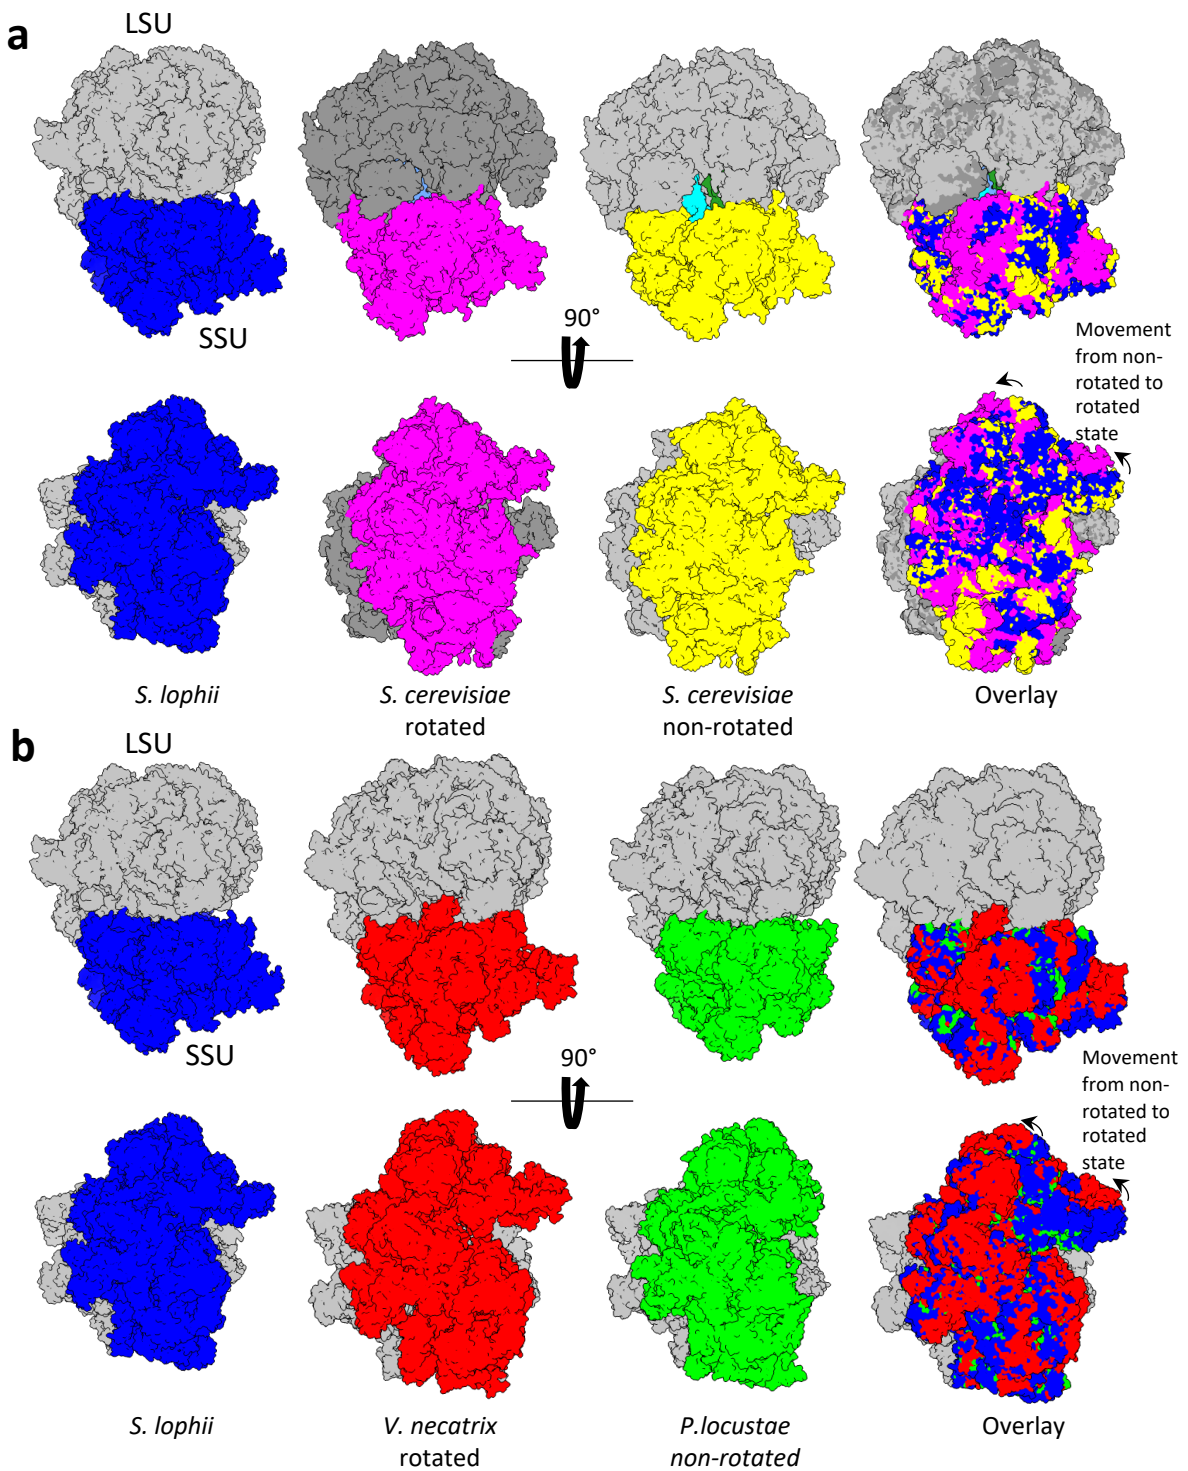

**Supplementary Figure 10 – The *S. lophii* monomeric ribosome is in a non-rotated state.**

**a** Ribosome structures (left to right: *S. lophii* (7QCA), *S. cerevisiae* (3J77; rotated state), *S. cerevisiae* (3J78; non-rotated state) and all structures overlaid) shown in surface representation. Ribosomes are displayed in a side view in the upper panel, and then rotated by 90° to show a bottom view in the lower panel. Large subunits are coloured grey and small subunits blue (*S. lophii*), magenta (*S. cerevisiae*, rotated state) and yellow (*S. cerevisiae*, non-rotated state). tRNA molecules bound to the yeast non-rotated state are coloured in cyan and green. **b** Microsporidian ribosome structures (left to right: *S. lophii* (7QCA), *V. necatrix* (6RM3; rotated state), *P. locustae* (7ZU5; non-rotated state) and all structures overlaid) shown in surface representation. Ribosomes are displayed in a side view in the upper panel, and then rotated by 90° to show a bottom view in the lower panel. Large subunits are coloured grey and small subunits blue (*S. lophii*), red (*V. necatrix*, rotated state) and green (*P. locustae*, non-rotated state).



**a**

```

Vn MDF1 1 MKYELIAKADFDNIKGLSCDQYPAILLSTACSFVHPKVVILTSESTIKEPNVYKCNWEM 60
Sl MDF1 1 MKYNVYIEGTFSGIQSIMVEQVYPITIKCSGCNLVHKKDVILSIDSINYTDKDEKVNLIK 60
      ***:: :. *.*::: :*.** :.:*.:** * ***: :* : * * ::

Vn MDF1 61 KCHSCKNDIKVSIYKSPSLSTVNIKDRYEDDLVLSYNPKNNECLLSILECSGGGEIREIK 120
Sl MDF1 61 KCASCTRQMYILI---KSMAT----ELYEEKFYCAKK--EDNRYLASQLQGRGCIYIEKIK 111
      ** *..::: : * *::: : *::.. : : :.:. * * *: * *.:**

Vn MDF1 121 NVPLNILTDDLRRLFNEKVVDEKRSLAEVYGNNKTYSIINYELEIRRVK 168
Sl MDF1 112 DANIHLVLESEKGRIPDIVFDEGYWREEDNMNN-TSSIEDFNIVLESVK 158
      :. :*:::: *.* * ** * ** :::: :. **

```

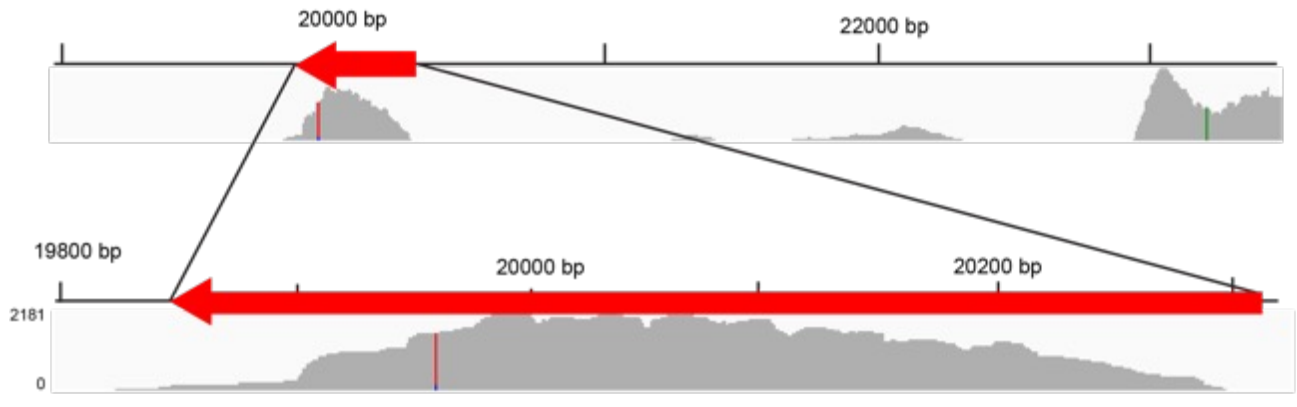**b**

```

P1 Lso2 1 MSRTRNAQKKYEGMMRKLKAKEERMKEEELKEEEAKKFWISIGAKDESKKQALELKRQEK 60
Sl Lso2 1 MSRTRNYVKKKEGRRLRKLTKLEEAKRLEEEKKEEELKEYWSVGAKDYSEEMAKEEKRLAK 60
      ***** ** * :***. ** * *** ** ** *::*:*** *:: * * * *

P1 Lso2 61 IARRAMRKKIYEEELGL----- 77
Sl Lso2 61 IEARKQRMEE--QERMEMEEIEKMK 82
      * * * : :*.: :

```

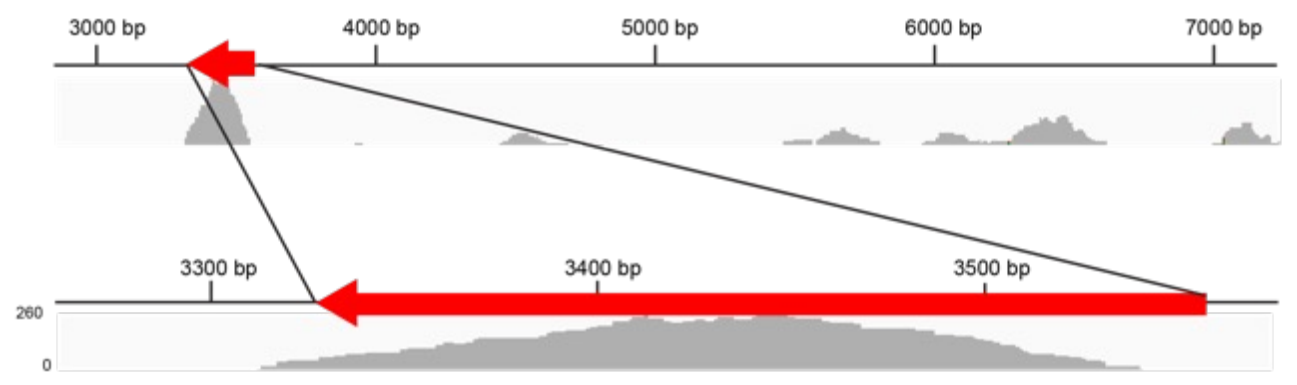

**Supplementary Figure 11 – MDF1 and Lso2 homologs are encoded in the genome of *S. lophii*.**

Sequence alignments of ribosomal hibernation factors. **a** BLASTP search of the *S. lophii* protein database with the MDF1 protein sequence from *V. nectatrix* resulted in a hit for hypothetical protein SLOPH\_1662 (EPR78075.1) with 29% sequence identity and 51% sequence similarity. **b** A putative Lso2 protein was identified in the *S. lophii* genome on contig ATCN01000495.1 using TBLASTN with the Lso2 from *P. locustae*. The sequences have 52% identity and 68% similarity. RNASeq reads from the *Spraguea lophii* transcriptome (SRX312311) were mapped onto the Celtic Deep *Spraguea lophii* assembly (GCA\_001887945.1) using Bowtie2<sup>51</sup> with default settings. Upper contigs show the context of the genes of interest and RNAseq coverage compared to immediately adjacent regions of the genome and lower contig regions focus on RNAseq coverage of the gene of interest.

| Preliminary annotation                     | Protein name | Number of peptides | Peak area |
|--------------------------------------------|--------------|--------------------|-----------|
| 60 S ribosomal protein L10                 | uL16         | 14                 | 5.51E09   |
| 40 S ribosomal protein S4                  | eS4          | 29                 | 4.90E09   |
| 60 S ribosomal protein L7                  | uL30         | 30                 | 4.69E09   |
| 40 S ribosomal protein S0                  | uS2          | 24                 | 4.38E09   |
| 40 S ribosomal protein S2                  | uS5          | 21                 | 4.14E09   |
| 40 S ribosomal protein S3                  | uS3          | 21                 | 4.08E09   |
| Ribosomal protein L23                      | uL14         | 11                 | 4.02E09   |
| 60 S ribosomal protein L4                  | uL4          | 30                 | 3.85E09   |
| 60 S ribosomal protein L3                  | uL3          | 39                 | 3.76E09   |
| 60 S ribosomal protein L12                 | uL11         | 8                  | 3.71E09   |
| 60 S ribosomal protein L17                 | uL22         | 20                 | 3.62E09   |
| 60 S ribosomal protein L10a                | uL10         | 19                 | 3.61E09   |
| 40 S ribosomal protein S14                 | uS11         | 11                 | 3.52E09   |
| 60 S ribosomal protein L18                 | eL18         | 23                 | 3.47E09   |
| 60 S ribosomal protein L5                  | uL18         | 26                 | 3.29E09   |
| 40 S ribosomal protein S20                 | uS10         | 13                 | 3.26E09   |
| 60 S ribosomal protein L8                  | eL8          | 14                 | 3.05E09   |
| Ribosomal protein L15                      | eL15         | 8                  | 2.91E09   |
| Ribosomal protein S19                      | eS19         | 17                 | 2.90E09   |
| 60 S ribosomal protein L11                 | uL5          | 9                  | 2.80E09   |
| Ribosomal protein L29                      | uL29         | 8                  | 2.73E09   |
| 40 S ribosomal protein S12                 | eS12         | 13                 | 2.65E09   |
| 60 S ribosomal protein L6                  | eL6          | 7                  | 2.62E09   |
| 60 S ribosomal protein L21                 | eL21         | 20                 | 2.57E09   |
| 60 S ribosomal protein L20                 | eL20         | 18                 | 2.55E09   |
| S7XVN9 uncharacterised protein             | -            | 10                 | 2.50E09   |
| 60 S ribosomal protein L23a                | uL14         | 10                 | 2.45E09   |
| 40 S ribosomal protein S9                  | uS4          | 19                 | 2.44E09   |
| 40 S ribosomal protein S7                  | eS7          | 12                 | 2.43E09   |
| 40 S ribosomal protein S11                 | uS17         | 23                 | 2.30E09   |
| 60 S ribosomal protein L26                 | uL24         | 14                 | 2.30E09   |
| 60 S ribosomal protein L37a                | eL43         | 6                  | 2.30E09   |
| 60 S ribosomal protein L9                  | uL6          | 17                 | 2.25E09   |
| Guanine nucleotide binding protein $\beta$ | RACK1        | 25                 | 2.21E09   |
| Ribosomal protein L34                      | eL34         | 6                  | 2.17E09   |
| 40 S ribosomal protein S16                 | uS9          | 7                  | 2.15E09   |
| 60 S ribosomal protein L8                  | eL8          | 19                 | 2.11E09   |
| 40 S ribosomal protein S26                 | eS26         | 4                  | 2.08E09   |

| Preliminary annotation                | Protein name | Number of peptides | Peak area      |
|---------------------------------------|--------------|--------------------|----------------|
| 40 S ribosomal protein S5             | uS7          | 17                 | 2.06E09        |
| 40 S ribosomal protein S15A           | uS19         | 13                 | 2.03E09        |
| 60 S ribosomal protein L32            | eL32         | 17                 | 2.00E09        |
| 60 S ribosomal protein L27            | eL27         | 11                 | 1.94E09        |
| 40 S ribosomal protein S13            | uS15         | 13                 | 1.90E09        |
| Ribosomal protein L13A                | eL13         | 18                 | 1.84E09        |
| 60 S ribosomal protein L35a           | uL29         | 7                  | 1.80E09        |
| 60 S ribosomal protein L31            | eL31         | 11                 | 1.76E09        |
| 60 S ribosomal protein L36            | eL36         | 10                 | 1.74E09        |
| 40 S ribosomal protein S25            | eS25         | 8                  | 1.70E09        |
| 60 S ribosomal protein L19            | eL19         | 14                 | 1.64E09        |
| 40 S ribosomal protein S24            | eS24         | 16                 | 1.62E09        |
| Ubiquitin/40 S ribosomal prot S27a    | eS31         | 9                  | 1.61E09        |
| 60 S ribosomal protein L13            | eL13         | 21                 | 1.51E09        |
| 40 S ribosomal protein S8             | eS8          | 11                 | 1.51E09        |
| 40 S ribosomal protein S10            | eS10         | 12                 | 1.39E09        |
| 40 S ribosomal protein S6             | eS6          | 13                 | 1.33E09        |
| 60 S ribosomal protein L39            | eL39         | 9                  | 1.23E09        |
| S7W9F9 uncharacterised protein        | -            | 9                  | 1.20E09        |
| 40 S ribosomal protein S29            | uS14         | 8                  | 1.10E09        |
| 60 S ribosomal protein L22            | eL22         | 10                 | 8.56E08        |
| 40 S ribosomal protein S18            | uS13         | 8                  | 8.50E08        |
| 60 S ribosomal protein L3             | uL3          | 12                 | 8.40E08        |
| S7XRH7 uncharacterised protein        | -            | 1                  | 7.91E08        |
| S7XL41 Uncharacterised protein        | -            | 8                  | 6.31E08        |
| Ribosomal protein S21E                | eS21         | 7                  | 5.89E08        |
| Ribosomal protein L24E                | eL24         | 8                  | 2.79E08        |
| 60 S ribosomal protein L44            | eL42         | 6                  | 2.52E08        |
| <b>S7W5K5 uncharacterised protein</b> | <b>MDF1</b>  | <b>12</b>          | <b>1.75E08</b> |
| S7W996 uncharacterised protein        | -            | 13                 | 1.72E08        |
| S7W9A1 uncharacterised protein        | -            | 7                  | 88280278       |
| S7WEE5 uncharacterised protein        | -            | 8                  | 73470297       |
| S7XUM1 uncharacterised protein        | -            | 7                  | 61605781       |
| S7WA57 uncharacterised protein        | -            | 2                  | 51516554       |
| 60 S ribosomal protein P0             | uL10         | 8                  | 46350286       |
| S7XJY0 uncharacterised protein        | -            | 3                  | 39028496       |
| S7XJ25 uncharacterised protein        | -            | 7                  | 24881672       |



| Preliminary annotation             | Protein name | Number of peptides | Peak area |
|------------------------------------|--------------|--------------------|-----------|
| S7W9S4 uncharacterised protein     | -            | 5                  | 24124621  |
| S7W6A0 uncharacterised protein     | -            | 1                  | 22330513  |
| S7W535 uncharacterised protein     | -            | 7                  | 18090219  |
| 60 S ribosomal protein P2          | P1/P2        | 3                  | 16879465  |
| Ubiquitin-40 S ribosomal prot S27a | eS31         | 4                  | 16446609  |
| S7W9Z4 uncharacterised protein     | -            | 2                  | 9578404   |
| S7W8B4 uncharacterised protein     | -            | 6                  | 8240642   |
| S7XIT1 uncharacterised protein     | -            | 3                  | 6803198   |
| S7W633 uncharacterised protein     | -            | 3                  | 5718484   |
| S7W7U9 uncharacterised protein     | -            | 3                  | 4781359   |
| S7W9D1 uncharacterised protein     | -            | 1                  | 4668589   |
| S7XF67 uncharacterised protein     | -            | 1                  | 3290196   |
| 60 S ribosomal protein             | -            | 1                  | 2760956   |
| S7XUL4 uncharacterised protein     | -            | 2                  | 2582596   |
| S7W4Q0 uncharacterised protein     | -            | 2                  | 2471210   |
| S7XKV6 uncharacterised protein     | -            | 1                  | 1905871   |
| S7W5D5 uncharacterised protein     | -            | 1                  | 1427322   |
| Ubiquitin-60 S ribosomal prot L40  | eL40         | 4                  | 1401421   |
| S7XLB7 uncharacterised protein     | -            | 1                  | 1030522   |
| S7W9X9 uncharacterised protein     | -            | 1                  | 927439    |
| S7XJ96 uncharacterised protein     | -            | 1                  | -         |
| S7XH02 uncharacterised protein     | -            | 1                  | -         |

**Supplementary Figure 12 – Mass spectrometry analysis of the purified *S. lophii* ribosome sample.** List of ribosomal and uncharacterised proteins identified in the mass spectrometry analysis of main ribosomal peak (point 2 in Fig. S6a). The proteins are presented in peak height order.

**a** Single particle map and model (EMD-13892 / PDB-7QCA)

Masked: 2.4 Å

Unmasked: 2.4 Å

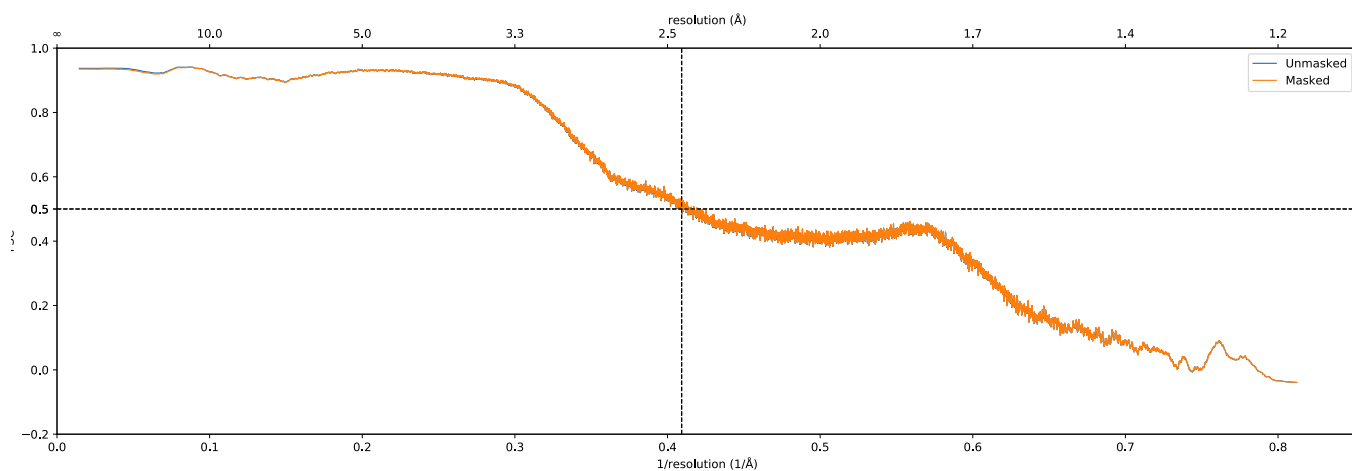

**b** Sub-tomogram average map of the half dimer and model (EMD-17448 / PDB-8P5D)

Masked: 11.4 Å

Unmasked: 11.6 Å

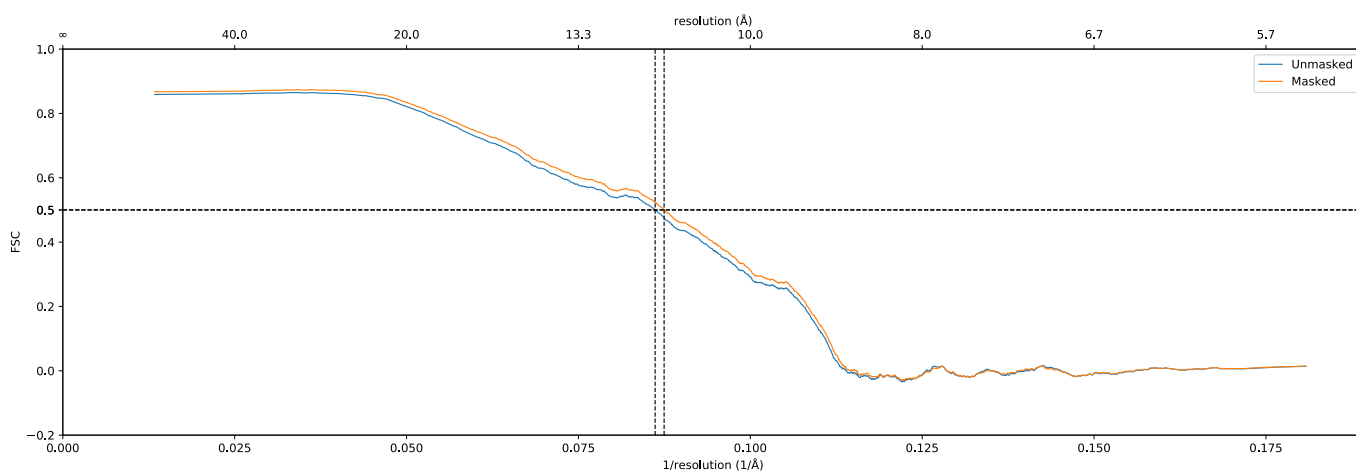

**c** Sub-tomogram average map of the full dimer and model (EMD-17457 / PDB-8P60)

Masked: 18.2 Å

Unmasked: 18.5 Å

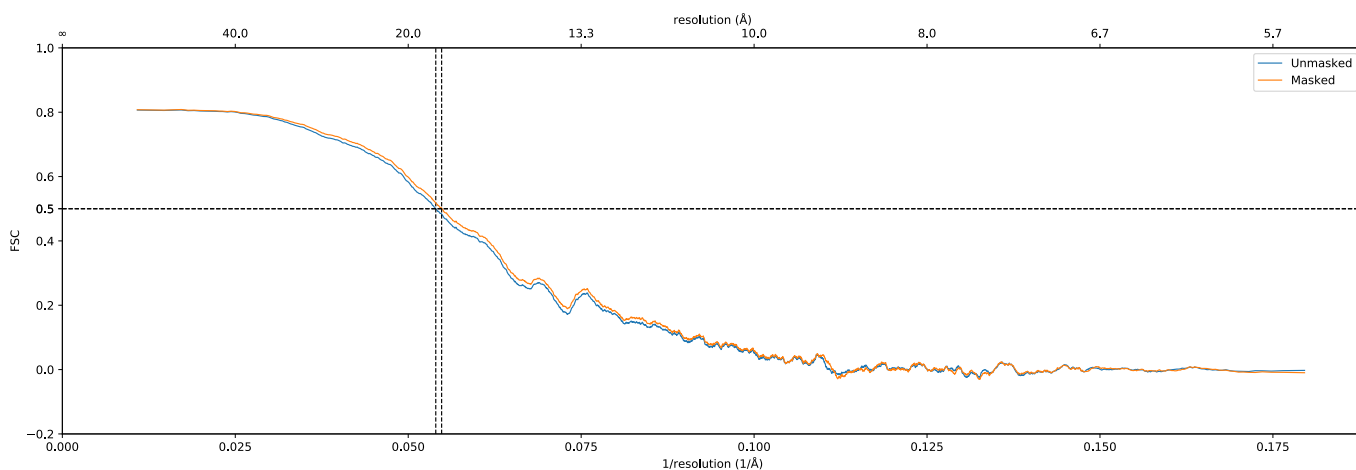

**Supplementary Figure 13 – Map/model FSCs.**

**a** Map/model FSC for the single particle map. **b** Map/model FSC for the half-dimer subtomogram average. **c** Map/model FSC for the full dimer subtomogram average.

| <b>Data Collection</b>                          | <b>Dataset 1</b>    | <b>Dataset 2</b>        |
|-------------------------------------------------|---------------------|-------------------------|
| Acceleration voltage (kV)                       | 300                 | 300                     |
| Pixel size (Å)                                  | 4.377               | 4.53 (2.265 super res.) |
| Defocus range (µm)                              | -4 to -6 (0.5 step) | -2.5 to -4.5 (0.5 step) |
| Frames per tilt                                 | 10                  | 26                      |
| Dose per tilt (e <sup>-</sup> /Å <sup>2</sup> ) | 1.90                | 1.97                    |
| Tilt range (°)                                  | -60 to +60          | -60 to +60              |
| Tilt step (°)                                   | 2                   | 2                       |
| Total dose (e <sup>-</sup> /Å <sup>2</sup> )    | 116                 | 120                     |

| <b>Depositions</b>                        |             |
|-------------------------------------------|-------------|
| <b>Dimer</b>                              |             |
| PDB ID                                    | 8P60        |
| EMDB accession number                     | 17457       |
| Resolution (Å) (Masked FSC = 0.143 / 0.5) | 14.3 / 20.0 |
| Resolution (Å) (map/model; FSC = 0.5)     | 18.2        |
| <b>Half-dimer</b>                         |             |
| PDB ID                                    | 8P5D        |
| EMDB accession number                     | 17448       |
| Resolution (Å) (Masked FSC = 0.143 / 0.5) | 10.8 / 15.5 |
| Resolution (Å) (map/model; FSC = 0.5)     | 11.4        |

**Supplementary Table 1** – Electron cryo-tomography data collection and subtomogram averaging statistics

|                                              | Dataset 1                      | Dataset 2     | Dataset 3        | Dataset 4        |                  |
|----------------------------------------------|--------------------------------|---------------|------------------|------------------|------------------|
| Acceleration voltage (kV)                    | 200                            | 200           | 200              | 300              |                  |
| Pixel size (Å)                               | 1.054                          | 1.054 (0.525) | 1.054 (0.525)    | 1.06 (0.53)      |                  |
| Defocus range (µm)                           | -1.2 to -2.5                   | -1.2 to -2.5  | -1.2 to -2.5     | -1.2 to -2.5     |                  |
| Frames per movie                             | 40                             | 40            | 40               | 40               |                  |
| Total dose (e <sup>-</sup> /Å <sup>2</sup> ) | 40                             | 42            | 41.34            | 41.6             |                  |
| Number of micrographs                        | 513                            | 1816          | 9192             | 15 989           |                  |
| Number of particles                          | 30 743                         | 83 575        | 206 256          | 657 305          |                  |
| Particles in final refinement                | 14 949                         | 42 390        | 114 880          | 113 721          |                  |
| <b>4 datasets combined</b>                   |                                |               |                  |                  |                  |
| Maps                                         | Overall                        | LSU focused   | SSU head focused | SSU body focused | L1 stalk focused |
| Resolution (Å) (0.143 FSC / 0.5 FSC)         | 2.79 / 3.09                    | 2.26 / 2.73   | 2.86 / 3.16      | 2.48 / 2.89      | 3.07 / 3.77      |
| EMDB accession number                        | All submitted under EMDB-13892 |               |                  |                  |                  |
| <b>Model Refinement – Overall map</b>        |                                |               |                  |                  |                  |
| PDB ID                                       | 7QCA                           |               |                  |                  |                  |
| EMDB accession number                        | 13892                          |               |                  |                  |                  |
| Resolution (Masked FSC = 0.143) (Å)          | 2.79                           |               |                  |                  |                  |
| Resolution map / model (FSC=0.5)             | 2.4                            |               |                  |                  |                  |
| <b>Model Composition</b>                     |                                |               |                  |                  |                  |
| Non-hydrogen atoms                           | 170,634                        |               |                  |                  |                  |
| Protein residues                             | 10,629                         |               |                  |                  |                  |
| RNA bases                                    | 3,972                          |               |                  |                  |                  |
| Ligands                                      | 368                            |               |                  |                  |                  |
| <b>RMS Deviations</b>                        |                                |               |                  |                  |                  |
| Bond length (Å)                              | 0.009                          |               |                  |                  |                  |
| Bond Angle (°)                               | 1.609                          |               |                  |                  |                  |
| <b>Validation</b>                            |                                |               |                  |                  |                  |
| Clash score                                  | 2.0                            |               |                  |                  |                  |
| Rotamer outliers (%)                         | 1.1                            |               |                  |                  |                  |
| <b>Ramachandran</b>                          |                                |               |                  |                  |                  |
| Favoured (%)                                 | 96.0                           |               |                  |                  |                  |
| Disallowed (%)                               | 0.1                            |               |                  |                  |                  |

**Supplementary Table 2** – Single particle cryoEM statistics
